# Supplementary material for: From NHANES to Network Pharmacology: HOMA-IR Mechanisms in Concurrent MASLD and Type 2 Diabetes
Source: Research Square preprint supplement (doi:10.21203/rs.3.rs-8101361/v1), 2025-11-19
Supplement: Supplementary file 1 [file c9667f09b024cc578a3f4e56.docx]

**Supplementary Table 1. Associations between HOMA-IR and co-existing MASLD and T2D in Univariate and Multivariable logistic regression Models**

|  | HOMA-IR and MASLD **+** T2D | | | |
| --- | --- | --- | --- | --- |
|  | MASLD (-), T2D (-) | MASLD (-), T2D (+) | MASLD (+), T2D (-) | MASLD (+), T2D (+) |
| HOMA-IR |  |  |  |  |
| Model 1a | 1.00 (Ref) | 1.99 (1.97, 2.03) | 1.74 (1.71, 1.77) | 2.01 (1.96, 2.07) |
| Model 2b | 1.00 (Ref) | 2.01 (1.98, 2.04) | 1.75 (1.72, 1.78) | 2.03 (1.98, 2.07) |
| Model 3c | 1.00 (Ref) | 1.64 (1.61, 1.70) | 1.39 (1.32, 1.44) | 1.66 (1.63, 1.71) |
|  | HOMA-IR and MASLD **+** prediabetes | | | |
|  | MASLD (-), prediabetes (-) | MASLD (-), prediabetes (+) | MASLD (+), prediabetes (-) | MASLD (+), prediabetes (+) |
| HOMA-IR |  |  |  |  |
| Model 1a | 1.00 (Ref) | 1.06 (1.03, 1.09) | 1.30 (1.27, 1.36) | 1.32 (1.26,1.37) |
| Model 2b | 1.00 (Ref) | 1.04 (1.01, 1.08) | 1.29 (1.26, 1.35) | 1.28 (1.22,1.35) |
| Model 3c | 1.00 (Ref) | 1.03 (1.01, 1.06) | 1.17 (1.12, 1.23) | 1.12 (1.08, 1.19) |
| Abbreviation: MASLD: metabolic dysfunction–associated steatotic liver disease; T2D: Type 2 diabetes.  Weighted multivariable logistic regression was used to evaluate the association between HOMA-IR and co-existing MASLD and T2D.  aModel 1 was adjusted for age, sex and race/ethnicity.  bModel 2 was adjusted for age, sex, race/ethnicity, education, PIR, recreational activity, smoking group and obesity.  cModel 3 was adjusted for age, sex, race/ethnicity, education, PIR, recreational activity, smoking group, obesity, BMI, weight and waist. | | | | |

**Supplementary Table 2. Sensitivity analysis of the associations between HOMA-IR and co-existing MASLD and T2D using extended models.**

|  | HOMA-IR and MASLD **+** T2D | | | |
| --- | --- | --- | --- | --- |
|  | MASLD (-), T2D (-) | MASLD (-), T2D (+) | MASLD (+), T2D (-) | MASLD (+), T2D (+) |
| HOMA-IR |  |  |  |  |
| Model 4a | 1.00 (Ref) | 1.67 (1.62, 1.76) | 1.39 (1.32, 1.46) | 1.66 (1.61, 1.74) |
| Model 5b | 1.00 (Ref) | 1.61 (1.57,1.69) | 1.37 (1.31, 1.46) | 1.63 (1.57, 1.69) |
|  | HOMA-IR and MASLD **+** prediabetes | | | |
|  | MASLD (-), prediabetes (-) | MASLD (-), prediabetes (+) | MASLD (+), prediabetes (-) | MASLD (+), prediabetes (+) |
| HOMA-IR |  |  |  |  |
| Model 4a | 1.00 (Ref) | 1.03 (1.01, 1.08) | 1.12 (1.07, 1.18) | 1.12(1.07, 1.16) |
| Model 5b | 1.00 (Ref) | 1.02 (1.01, 1.06) | 1.04 (1.01, 1.09) | 1.04 (1.01, 1.09) |
| Abbreviation: MASLD: metabolic dysfunction–associated steatotic liver disease; T2D: Type 2 diabetes.  Weighted multivariable logistic regression was used to evaluate the association between HOMA-IR and co-existing MASLD and T2D.  aModel 4 was adjusted for age, sex, race/ethnicity, education, PIR, recreational activity, smoking group, obesity, BMI, weight, waist and CRP.  bModel 5 was adjusted for age, sex, race/ethnicity, education, PIR, recreational activity, smoking group, obesity, BMI, weight, waist, CRP, ALT and AST. | | | | |

**Supplementary Table 3. Associations between HOMA-IR and co-existing MASLD and prediabetes compared to having MASLD only and prediabetes only in the overall sample and stratified by sex and race/ethnicity.**

|  | Coexisting MASLD and prediabetes vs. MASLD only,  OR (95% CI) | |  | Coexisting MASLD and prediabetes vs. prediabetes only, OR (95% CI) | |
| --- | --- | --- | --- | --- | --- |
| Prediabetes (-), MASLD (**+**) | Prediabetes (**+**), MASLD (**+**) | Prediabetes (**+**), MASLD (-) | Prediabetes (**+**), MASLD (**+**) |
| HOMA-IR |  |  |  |  |  |
| Overall sample |  |  |  |  |  |
| Model 1a | 1.00 (Ref) | 1.02 (1.01, 1.07) |  | 1.00 (Ref) | 1.13 (1.10, 1.19) |
| Model 2b | 1.00 (Ref) | 1.02 (1.01, 1.07) |  | 1.00 (Ref) | 1.21 (1.19,1.27) |
| Model 3c | 1.00 (Ref) | 1.03 (1.02, 1.06) |  | 1.00 (Ref) | 1.12 (1.08, 1.19) |
| Stratified by sex |  |  |  |  |  |
| Female |  |  |  |  |  |
| Model 1a | 1.00 (Ref) | 1.04 (1.01, 1.08) |  | 1.00 (Ref) | 1.21 (1.15, 1.26) |
| Model 2b | 1.00 (Ref) | 1.04 (1.02, 1.09) |  | 1.00 (Ref) | 1.21 (1.14,1.27) |
| Model 3c | 1.00 (Ref) | 1.03 (1.01, 1.07) |  | 1.00 (Ref) | 1.17 (1.13, 1.24) |
| Male |  |  |  |  |  |
| Model 1a | 1.00 (Ref) | 0.98 (0.95, 0.99) |  | 1.00 (Ref) | 1.26 (1.20, 1.29) |
| Model 2b | 1.00 (Ref) | 0.96 (0.92, 0.99) |  | 1.00 (Ref) | 1.27 (1.21, 1.34) |
| Model 3c | 1.00 (Ref) | 0.95 (0.91, 0.99) |  | 1.00 (Ref) | 1.09 (1.02, 1.14) |
| Stratified by race/ethnicity |  |  |  |  |  |
| Hispanic |  |  |  |  |  |
| Model 1a | 1.00 (Ref) | 0.96 (0.91, 0.98) |  | 1.00 (Ref) | 1.41 (1.38, 1.45) |
| Model 2b | 1.00 (Ref) | 0.94 (0.90, 0.995) |  | 1.00 (Ref) | 1.38 (1.34,1.48) |
| Model 3c | 1.00 (Ref) | 0.91 (0.87, 0.97) |  | 1.00 (Ref) | 1.32 (1.27, 1.38) |
| Non-Hispanic White |  |  |  |  |  |
| Model 1a | 1.00 (Ref) | 1.04 (1.01, 1.09) |  | 1.00 (Ref) | 1.15 (1.11, 1.19) |
| Model 2b | 1.00 (Ref) | 1.07 (1.02,1.09) |  | 1.00 (Ref) | 1.16 (1.12,1.23) |
| Model 3c | 1.00 (Ref) | 1.17 (1.12, 1.26) |  | 1.00 (Ref) | 1.05 (1.01, 1.09) |
| Non-Hispanic Black |  |  |  |  |  |
| Model 1a | 1.00 (Ref) | 1.05 (1.02,1.11) |  | 1.00 (Ref) | 1.31 (1.27, 1.38) |
| Model 2b | 1.00 (Ref) | 1.04 (1.01, 1.09) |  | 1.00 (Ref) | 1.35 (1.31,1.39) |
| Model 3c | 1.00 (Ref) | 0.96 (0.91, 0.99) |  | 1.00 (Ref) | 1.15 (1.11, 1.24) |
| Abbreviation: MASLD: metabolic dysfunction–associated steatotic liver disease  Weighted multivariable logistic regression was used to evaluate the association between HOMA-IR and co-existing MASLD and T2D.  aModel 1 was adjusted for age, sex and race/ethnicity.  bModel 2 was adjusted for age, sex, race/ethnicity, education, PIR, recreational activity, smoking group and obesity.  cModel 3 was adjusted for age, sex, race/ethnicity, education, PIR, recreational activity, smoking group, obesity, BMI, weight and waist. | | | | | |

**Supplementary Table 4. Associations between HOMA-IR and co-existing MASLD and T2D in the overall sample and stratified by sex and race/ethnicity.**

|  | MASLD (-), T2D (-) | MASLD (-), T2D (+) | MASLD (+), T2D (-) | MASLD (+), T2D (+) |
| --- | --- | --- | --- | --- |
| Female | | | | |
| HOMA-IR |  |  |  |  |
| Model 1a | 1.00 (Ref) | 2.01 (1.97, 2.05) | 1.68 (1.64, 1.73) | 2.03 (1.99, 2.08) |
| Model 2b | 1.00 (Ref) | 2.01 (1.98, 2.06) | 1.66 (1.62, 1.72) | 2.06 (2.01, 2.13) |
| Model 3c | 1.00 (Ref) | 1.74 (1.71, 1.78) | 1.33 (1.26, 1.38) | 1.71 (1.67, 1.76) |
| Male | | | | |
| HOMA-IR |  |  |  |  |
| Model 1a | 1.00 (Ref) | 2.02 (1.97, 2.06) | 1.81 (1.76, 1.89) | 2.02 (1.98 2.06) |
| Model 2b | 1.00 (Ref) | 1.99 (1.95, 2.04) | 1.79 (1.71, 1.85) | 2.07 (2.01, 2.14) |
| Model 3c | 1.00 (Ref) | 1.68 (1.62, 1.73) | 1.69 (1.62, 1.77) | 1.64 (1.61, 1.74) |
| Hispanic | | | | |
| HOMA-IR |  |  |  |  |
| Model 1a | 1.00 (Ref) | 2.33 (2.27, 2.38) | 2.02 (1.96, 2.08) | 2.44 (2.41, 2.50) |
| Model 2b | 1.00 (Ref) | 2.33 (2.26, 2.37) | 1.98 (1.95, 2.06) | 2.45 (2.42, 2.54) |
| Model 3c | 1.00 (Ref) | 1.83 (1.78, 1.89) | 1.39 (1.34, 1.46) | 1.68 (1.63, 1.71) |
| Non-Hispanic White | | | | |
| HOMA-IR |  |  |  |  |
| Model 1a | 1.00 (Ref) | 2.06 (2.02, 2.14) | 1.73 (1.68, 1.79) | 2.06 (2.03, 2.10) |
| Model 2b | 1.00 (Ref) | 2.01 (1.97, 2.07) | 1.73 (1.69, 1.78) | 2.08 (2.02, 2.14) |
| Model 3c | 1.00 (Ref) | 1.63 (1.57, 1.69) | 1.54 (1.49, 1.65) | 1.60 (1.57, 1.68) |
| Non-Hispanic Black | | | | |
| HOMA-IR |  |  |  |  |
| Model 1a | 1.00 (Ref) | 1.61 (1.58, 1.65) | 1.63 (1.57,1.69) | 1.79 (1.75, 1.86) |
| Model 2b | 1.00 (Ref) | 1.64 (1.61, 1.69) | 1.67 (1.61, 1.72) | 1.86 (1.82, 1.91) |
| Model 3c | 1.00 (Ref) | 1.71 (1.67, 1.75) | 1.41 (1.38, 1.46) | 1.73 (1.67, 1.78) |
| Abbreviation: MASLD: metabolic dysfunction–associated steatotic liver disease; T2D: Type 2 diabetes.  Weighted multivariable logistic regression was used to evaluate the association between HOMA-IR and co-existing MASLD and T2D.  aModel 1 was adjusted for age, sex and race/ethnicity.  bModel 2 was adjusted for age, sex, race/ethnicity, education, PIR, recreational activity, smoking group and obesity.  cModel 3 was adjusted for age, sex, race/ethnicity, education, PIR, recreational activity, smoking group, obesity, BMI, weight and waist. | | | | |

**Supplementary Table 5. Mediation Analysis of the Effect of HOMA-IR on the risk of co-existing MASLD and prediabetes compared to MASLD only**

| Independent variables | Mediating variables | Total effect | |  | Direct effect | |  | Indirect effects | | Proportion of mediators，% |
| --- | --- | --- | --- | --- | --- | --- | --- | --- | --- | --- |
| Coefficient (95% CI) | P value | Coefficient (95% CI) | P value | Coefficient (95% CI) | P value |
| HOMA-IR |  |  |  |  |  |  |  |  |  |  |
|  | FPG | -0.0032 (-0.0057, 0.0012) | 0.0800 |  | 0.0002 (-0.0023, 0.0028) | 0.9600 |  | -0.0034 (-0.0048, -0.023) | ＜0.0001 | 79.27 |
|  | HbAlc | -0.0033 (-0.0069, 0.0004) | 0.0920 |  | 0.0005 (-0.0031, 0.0041) | 0.7920 |  | -0.0038 (-0.0055, -0.0023) | ＜0.0001 | 25.18 |
|  | LDL-C | -0.0029 (-0.0050, -0.0002) | 0.0400 |  | -0.0024 (-0.0048, 0.0006) | 0.0800 |  | -0.0004 (-0.0011, -0.0001) | 0.0400 | 5.04 |
| Abbreviations：FPG：Fasting Plasma Glucose；HbAlc：hemoglobin A1c；LDL-C：low-density lipoprotein cholesterol.  The model was adjusted for age, sex, race/ethnicity, education, PIR, recreational activity, smoking group, obesity, BMI, weight and waist. | | | | | | | | | | |

**Supplementary Table 6. Mediation Analysis of the Effect of HOMA-IR on the risk of co-existing MASLD and T2D compared to MASLD only**

| Independent variables | Mediating variables | Total effect | |  | Direct effect | |  | Indirect effects | | Proportion of mediators，% |
| --- | --- | --- | --- | --- | --- | --- | --- | --- | --- | --- |
| Coefficient (95% CI) | P value | Coefficient (95% CI) | P value | Coefficient (95% CI) | P value |
| HOMA-IR |  |  |  |  |  |  |  |  |  |  |
|  | TC | 0.0228 (0.0187, 0.0265) | ＜0.0001 |  | 0.0227 (0.0186, 0.0263) | ＜0.0001 |  | 0.0002 (-0.0001, 0.0004) | 0.2400 | 0.35 |
|  | TG | 0.0218 (0.0179, 0.0254) | ＜0.0001 |  | 0.0215 (0.0175, 0.0253) | ＜0.0001 |  | 0.0003 (-0.0002, 0.0007) | 0.0800 | 1.27 |
|  | LDL-C | 0.0227 (0.0186, 0.0261) | ＜0.0001 |  | 0.0225 (0.0186, 0.0259) | ＜0.0001 |  | 0.0002 (-0.0001, 0.0004 ) | 0.0800 | 0.51 |
| Abbreviations：LDL-C：low-density lipoprotein cholesterol；TG：triglycerides；TC：total cholesterol.  The model was adjusted for age, sex, race/ethnicity, education, PIR, recreational activity, smoking group, obesity, BMI, weight and waist. | | | | | | | | | | |

**Supplementary Table 7. Mediation Analysis of the Effect of HOMA-IR on the risk of co-existing MASLD and prediabetes compared to MASLD only**

| Independent variables | Mediating variables | Total effect | |  | Direct effect | |  | Indirect effects | | Proportion of mediators，% |
| --- | --- | --- | --- | --- | --- | --- | --- | --- | --- | --- |
| Coefficient (95% CI) | P value | Coefficient (95% CI) | P value | Coefficient (95% CI) | P value |
| HOMA-IR |  |  |  |  |  |  |  |  |  |  |
|  | HDL-C | -0.0031 (-0.0053, 0.0015) | 0.0800 |  | -0.0028 (-0.0052, 0.0005) | 0.0800 |  | -0.0002 (-0.0007, 0.0002) | 0.4400 | 5.81 |
|  | TC | -0.0029 (-0.0051, 0.0002) | 0.0400 |  | -0.0026 (-0.0049, 0.0005) | 0.0800 |  | -0.0003 (-0.0009, 0.0001) | 0.1200 | 9.58 |
|  | TG | -0.0030 (-0.0055, 0.0001) | 0.0800 |  | -0.0030 (-0.0053, 0.0001) | 0.0800 |  | -0.0002 (-0.0004, 0.0005) | 0.9600 | 0.93 |
| Abbreviations：HDL-C：high-density lipoprotein cholesterol；TG：triglycerides；TC：total cholesterol.  The model was adjusted for age, sex, race/ethnicity, education, PIR, recreational activity, smoking group, obesity, BMI, weight and waist. | | | | | | | | | | |
